# Supplementary material for: Barium ion adduct mass spectrometry to identify carboxylic acid photoproducts from crude oil–water systems under solar irradiation
Source: Royal Society of Chemistry journal article supplement (doi:10.1039/d0em00390e), 2020-01-01
Supplement: d0em00390e1.pdf [file d0em00390e1.pdf]

## Supporting Information

### **Barium ion adduct mass spectrometry to identify carboxylic acid photoproducts from crude oil-water systems under solar irradiation**

Phoebe Zito<sup>1,2\*</sup>, Donald F. Smith<sup>3</sup>, Xian Cao<sup>1</sup>, Rana Ghannam<sup>1,2</sup>, and Matthew A. Tarr<sup>1</sup>

<sup>1</sup>Department of Chemistry, <sup>2</sup>Pontchartrain Institute for Environmental Sciences, Chemical Analysis & Mass Spectrometry Facility, University of New Orleans, New Orleans, Louisiana 70148, United States

<sup>3</sup>National High Magnetic Field Laboratory, Florida State University, Tallahassee, Florida 32310, United States

\*Corresponding Author ([pazito@uno.edu](mailto:pazito@uno.edu) )

**Number of figures: 3**

**Number of Tables: 1**

**Total pages: 5**

| <b><u>Iteration Number</u></b> | <b><u>Element</u></b> | <b><u>Minimum</u></b> | <b><u>Maximum</u></b> |
|--------------------------------|-----------------------|-----------------------|-----------------------|
| <b>1)</b>                      | <b>C</b>              | <b>1</b>              | <b>100</b>            |
|                                | <b>H</b>              | <b>4</b>              | <b>200</b>            |
|                                | <b>N</b>              | <b>0</b>              | <b>1</b>              |
|                                | <b>O</b>              | <b>0</b>              | <b>6</b>              |
|                                | <b>S</b>              | <b>0</b>              | <b>1</b>              |
|                                | <b>138 Ba</b>         | <b>1</b>              | <b>2</b>              |
|                                | <b>137 Ba</b>         | <b>0</b>              | <b>0</b>              |
| <b>2)</b>                      | <b>C</b>              | <b>1</b>              | <b>100</b>            |
|                                | <b>H</b>              | <b>4</b>              | <b>200</b>            |
|                                | <b>N</b>              | <b>0</b>              | <b>2</b>              |
|                                | <b>O</b>              | <b>0</b>              | <b>6</b>              |
|                                | <b>S</b>              | <b>0</b>              | <b>2</b>              |
|                                | <b>138 Ba</b>         | <b>0</b>              | <b>0</b>              |
|                                | <b>137 Ba</b>         | <b>0</b>              | <b>0</b>              |
| <b>3)</b>                      | <b>C</b>              | <b>1</b>              | <b>100</b>            |
|                                | <b>H</b>              | <b>4</b>              | <b>200</b>            |
|                                | <b>N</b>              | <b>0</b>              | <b>2</b>              |
|                                | <b>O</b>              | <b>0</b>              | <b>15</b>             |
|                                | <b>S</b>              | <b>0</b>              | <b>2</b>              |
|                                | <b>138 Ba</b>         | <b>0</b>              | <b>0</b>              |
|                                | <b>137 Ba</b>         | <b>0</b>              | <b>0</b>              |
| <b>4)</b>                      | <b>C</b>              | <b>1</b>              | <b>100</b>            |
|                                | <b>H</b>              | <b>4</b>              | <b>200</b>            |
|                                | <b>N</b>              | <b>0</b>              | <b>2</b>              |
|                                | <b>O</b>              | <b>0</b>              | <b>15</b>             |
|                                | <b>S</b>              | <b>0</b>              | <b>2</b>              |
|                                | <b>138 Ba</b>         | <b>1</b>              | <b>2</b>              |
|                                | <b>137 Ba</b>         | <b>0</b>              | <b>0</b>              |
| <b>5)</b>                      | <b>C</b>              | <b>1</b>              | <b>100</b>            |
|                                | <b>H</b>              | <b>4</b>              | <b>200</b>            |
|                                | <b>N</b>              | <b>0</b>              | <b>2</b>              |
|                                | <b>O</b>              | <b>0</b>              | <b>15</b>             |
|                                | <b>S</b>              | <b>0</b>              | <b>2</b>              |
|                                | <b>138 Ba</b>         | <b>1</b>              | <b>2</b>              |
|                                | <b>137 Ba</b>         | <b>1</b>              | <b>2</b>              |

**Table S1:** Elemental constraints for each molecular assignment iteration.

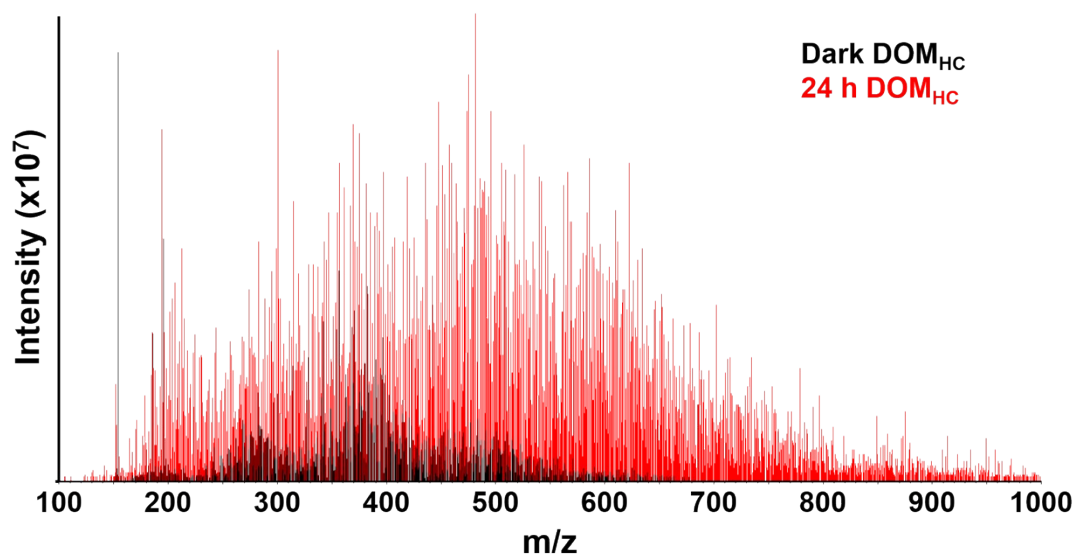

**Figure S1:** Overlay of spectra comparing derivatized samples at 25 ppm C of precursor ion scan of m/z 155 showing possible  $[M-H+Ba]^+$  peaks for dark (black) and irradiated DOM<sub>HC</sub> (red) produced after 24 h of sunlight exposure on an AbSciex 3200 Qtrap using (+) ESI MS/MS.

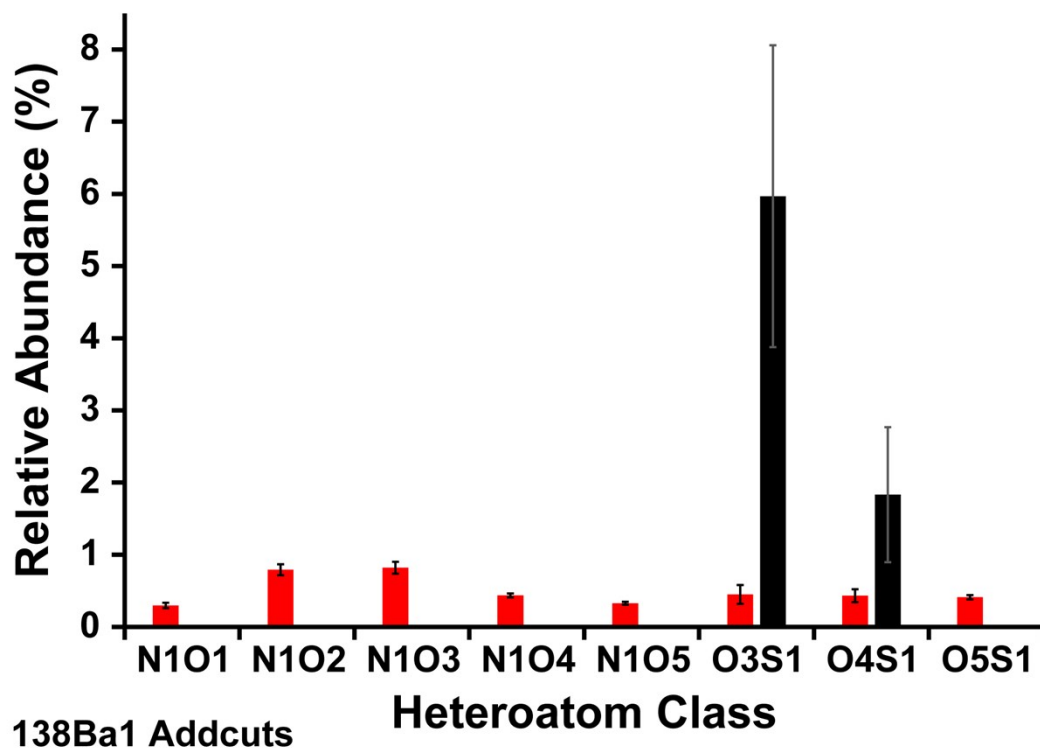

**Figure S2.** Heteroatom class distribution for barium 138 containing adducts detected in the dark (black) and irradiated (red)  $\text{DOM}_{\text{HC}}$ . Error bars represent standard deviation ( $n=3$ ).

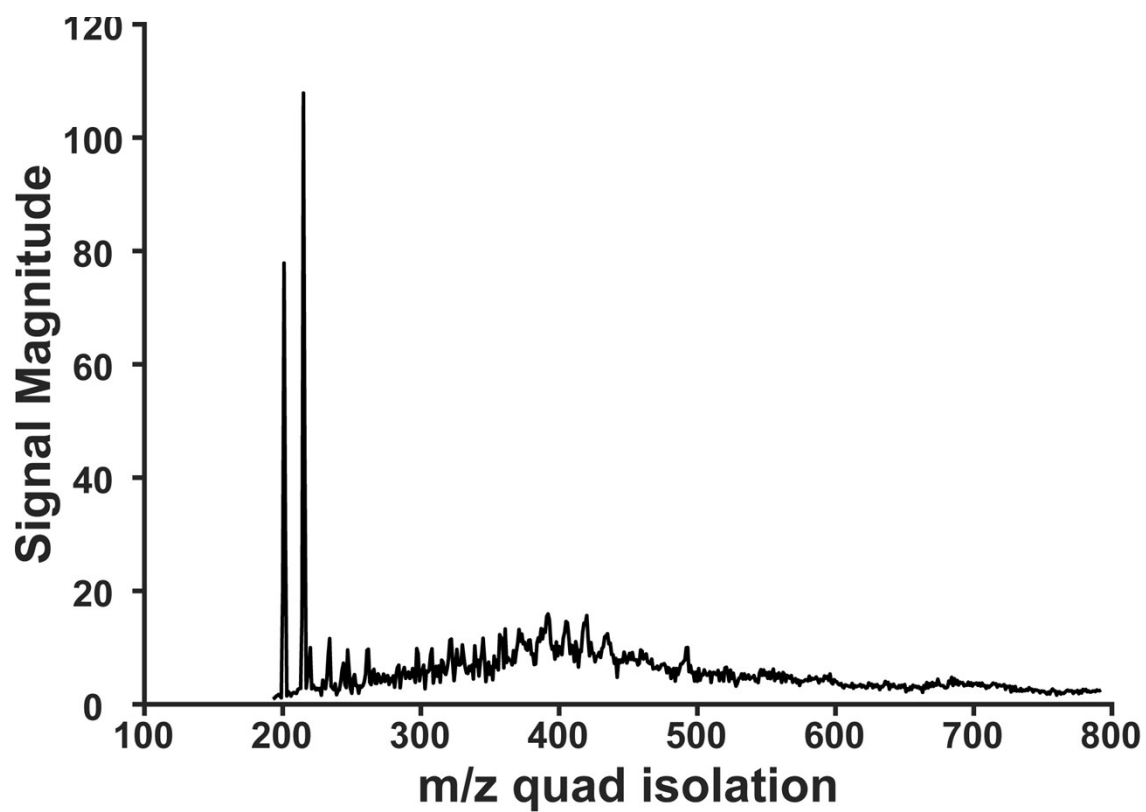

**Figure S3.** Plot of m/z quad isolation vs. signal magnitude for m/z 196.918 ( $\text{C}_2\text{H}_3\text{O}_2^{138}\text{Ba}^+$ ) detected in the  $\text{DOM}_{\text{HC}}$  after light exposure using FT-ICR MS/IRMPD.
